# Supplementary material for: The osteoconductive properties of graphene-based material surfaces are finely tuned by the conditioning layer and surface chemistry
Source: Royal Society of Chemistry journal article supplement (doi:10.1039/d4ma00144c), 2024-01-01
Supplement: d4ma00144c1.xlsx [file d4ma00144c1.xlsx]

## Sheet: PCL
Accession	Description	ΣCoverage	Σ# Proteins	Σ# Unique Peptides	Σ# Peptides	Σ# PSMs	A5: Area	B5: Area	C5: Area	Score A2	Coverage A2	# Peptides A2	# PSM A2	Score B2	Coverage B2	# Peptides B2	# PSM B2	Score C2	Coverage C2	# Peptides C2	# PSM C2	# AAs	MW [kDa]	calc. pI
P01834	Immunoglobulin kappa constant OS=Homo sapiens OX=9606 GN=IGKC PE=1 SV=2 - [IGKC_HUMAN]	34.58	2	2	2	12	3.90199e+06	4.00282e+06	3.9696e+06	19.6043	34.58	2	4	18.2353	34.58	2	4	17.9287	34.58	2	4	107	11.7578	6.52197
P02768	Albumin OS=Homo sapiens OX=9606 GN=ALB PE=1 SV=2 - [ALBU_HUMAN]	30.21	1	18	18	1425	1.0714e+09	1.25166e+09	1.27943e+09	1679.67	29.72	17	562	1437.8	30.21	18	462	1237.27	30.21	18	401	609	69.3215	6.27783
P35908	Keratin, type II cytoskeletal 2 epidermal OS=Homo sapiens OX=9606 GN=KRT2 PE=1 SV=2 - [K22E_HUMAN]	28.01	1	12	13	91	8.9137e+06	9.05418e+06	9.00269e+06	127.868	23.63	11	32	114.397	24.1	11	28	132.4	26.6	12	31	639	65.3932	8.00146
P02787	Serotransferrin OS=Homo sapiens OX=9606 GN=TF PE=1 SV=3 - [TRFE_HUMAN]	27.36	1	15	15	55	2.61564e+06	2.43948e+06	2.49698e+06	63.6926	18.05	10	18	68.9649	25.79	14	20	62.5272	22.06	12	17	698	77.0136	7.12256
P13645	Keratin, type I cytoskeletal 10 OS=Homo sapiens OX=9606 GN=KRT10 PE=1 SV=6 - [K1C10_HUMAN]	23.12	1	10	11	93	1.76062e+07	1.75226e+07	1.71438e+07	112.026	23.12	11	31	115.116	23.12	11	32	114.882	21.4	10	30	584	58.7917	5.21143
P35527	Keratin, type I cytoskeletal 9 OS=Homo sapiens OX=9606 GN=KRT9 PE=1 SV=3 - [K1C9_HUMAN]	20.39	1	10	10	76	8.85366e+06	6.48321e+06	6.47422e+06	112.342	16.53	8	28	107.655	16.85	8	25	103.118	18.94	9	23	623	62.0268	5.23682
P04264	Keratin, type II cytoskeletal 1 OS=Homo sapiens OX=9606 GN=KRT1 PE=1 SV=6 - [K2C1_HUMAN]	19.88	1	11	12	145	1.42696e+07	1.46183e+07	1.45574e+07	213.624	19.88	12	59	175.172	19.88	12	47	150.185	19.88	12	39	644	65.999	8.11865
P00738	Haptoglobin OS=Homo sapiens OX=9606 GN=HP PE=1 SV=1 - [HPT_HUMAN]	17	1	6	6	29	1.69764e+06	1.55909e+06	1.30547e+06	29.8836	17	6	9	29.3803	14.78	5	9	37.6146	14.78	5	11	406	45.1766	6.58057
P02647	Apolipoprotein A-I OS=Homo sapiens OX=9606 GN=APOA1 PE=1 SV=1 - [APOA1_HUMAN]	16.85	1	4	4	12	1.60703e+06	1.66579e+06	1.66133e+06	13.8571	16.85	4	5	11.6122	12.73	3	4	9.40393	12.73	3	3	267	30.7589	5.75732
Q04695	Keratin, type I cytoskeletal 17 OS=Homo sapiens OX=9606 GN=KRT17 PE=1 SV=2 - [K1C17_HUMAN]	15.51	1	3	6	20	1.7722e+06	1.57364e+06	1.55958e+06	26.6349	12.96	5	7	24.8206	12.73	5	7	23.8284	10.88	4	6	432	48.076	5.021
P02533	Keratin, type I cytoskeletal 14 OS=Homo sapiens OX=9606 GN=KRT14 PE=1 SV=4 - [K1C14_HUMAN]	14.41	1	2	6	25	3.38879e+06	3.9985e+06	4.34663e+06		0			41.1828	14.41	6	12	28.7489	8.9	4	8	472	51.5294	5.16064
P02760	Protein AMBP OS=Homo sapiens OX=9606 GN=AMBP PE=1 SV=1 - [AMBP_HUMAN]	12.5	1	3	3	4	1.36784e+06	75980	685341		0			4.47238	9.09	2	2	6.32923	8.24	2	2	352	38.974	6.25244
P13647	Keratin, type II cytoskeletal 5 OS=Homo sapiens OX=9606 GN=KRT5 PE=1 SV=3 - [K2C5_HUMAN]	11.69	1	5	6	21	1.42041e+06	1.32319e+06	1.67186e+06	27.2711	11.69	6	8	27.1266	11.69	6	8	16.9051	7.63	4	5	590	62.34	7.73779
P01857	Immunoglobulin heavy constant gamma 1 OS=Homo sapiens OX=9606 GN=IGHG1 PE=1 SV=1 - [IGHG1_HUMAN]	10.91	2	2	3	8	8.11746e+06	7.66017e+06	7.28849e+06	11.8613	10.91	3	4	8.85841	10.91	3	3		0			330	36.0832	8.19189
P02538	Keratin, type II cytoskeletal 6A OS=Homo sapiens OX=9606 GN=KRT6A PE=1 SV=3 - [K2C6A_HUMAN]	10.82	3	5	6	12	1.15578e+06	1.04777e+06	916828	18.6964	7.8	5	5	9.98379	3.9	3	3	14.5912	6.91	4	4	564	60.0083	8.00146
P04196	Histidine-rich glycoprotein OS=Homo sapiens OX=9606 GN=HRG PE=1 SV=1 - [HRG_HUMAN]	8.19	1	4	4	10	797642	948025	416325	10.013	6.1	3	3	13.8003	8.19	4	4	9.9065	5.9	3	3	525	59.5409	7.50342
P01859	Immunoglobulin heavy constant gamma 2 OS=Homo sapiens OX=9606 GN=IGHG2 PE=1 SV=2 - [IGHG2_HUMAN]	7.36	2	1	2	7	4.15736e+06	4.24139e+06	4.04593e+06		0			12.0511	7.36	2	3	11.9131	7.36	2	3	326	35.8778	7.59131
P01009	Alpha-1-antitrypsin OS=Homo sapiens OX=9606 GN=SERPINA1 PE=1 SV=3 - [A1AT_HUMAN]	6.7	1	2	2	7	819215	820605	1.37352e+06	10.0878	6.7	2	4	8.69996	6.7	2	3		0			418	46.707	5.59229
P01876	Immunoglobulin heavy constant alpha 1 OS=Homo sapiens OX=9606 GN=IGHA1 PE=1 SV=2 - [IGHA1_HUMAN]	6.23	1	2	2	9	980874	936893	890637	12.6408	6.23	2	4	9.30976	6.23	2	3	6.82354	6.23	2	2	353	37.6306	6.50732
P01042	Kininogen-1 OS=Homo sapiens OX=9606 GN=KNG1 PE=1 SV=2 - [KNG1_HUMAN]	6.21	1	3	3	4	228960	170961	331235	5.15506	3.88	2	2	5.52597	4.04	2	2		0			644	71.9122	6.81494
P01871	Immunoglobulin heavy constant mu OS=Homo sapiens OX=9606 GN=IGHM PE=1 SV=4 - [IGHM_HUMAN]	5.96	2	2	2	5	343215	371122	248771	7.9617	5.96	2	2	11.1357	5.96	2	3		0			453	49.4086	6.771
P01023	Alpha-2-macroglobulin OS=Homo sapiens OX=9606 GN=A2M PE=1 SV=3 - [A2MG_HUMAN]	5.56	1	7	7	10	527679	245859	326220	19.3096	4.34	6	6	13.6978	3.6	4	4		0			1474	163.188	6.45557
P19827	Inter-alpha-trypsin inhibitor heavy chain H1 OS=Homo sapiens OX=9606 GN=ITIH1 PE=1 SV=3 - [ITIH1_HUMAN]	2.52	1	2	2	2	620548	368862	0		0			6.33938	2.52	2	2		0			911	101.326	6.78564
P01024	Complement C3 OS=Homo sapiens OX=9606 GN=C3 PE=1 SV=2 - [CO3_HUMAN]	2.22	1	3	3	4	1.00469e+06	1.02463e+06	121743	5.25564	1.26	2	2	4.62893	1.5	2	2		0			1663	187.03	6.40479
P04114	Apolipoprotein B-100 OS=Homo sapiens OX=9606 GN=APOB PE=1 SV=2 - [APOB_HUMAN]	0.57	1	2	2	4	254310	259237	0	5.46657	0.57	2	2	5.25951	0.57	2	2		0			4563	515.283	7.04932

## Sheet: PCL-GO
Accession	Description	ΣCoverage	Σ# Proteins	Σ# Unique Peptides	Σ# Peptides	Σ# PSMs	A5: Area	B5: Area	C5: Area	Score A2	Coverage A2	# Peptides A2	# PSM A2	Score B2	Coverage B2	# Peptides B2	# PSM B2	Score C2	Coverage C2	# Peptides C2	# PSM C2	# AAs	MW [kDa]	calc. pI
P01834	Immunoglobulin kappa constant OS=Homo sapiens OX=9606 GN=IGKC PE=1 SV=2 - [IGKC_HUMAN]	51.4	1	3	3	53	9.00865e+06	8.52088e+06	9.02406e+06	55.2458	51.4	3	14	70.1368	51.4	3	21	69.2808	51.4	3	18	107	11.7578	6.52197
P0CF74	Immunoglobulin lambda constant 6 OS=Homo sapiens OX=9606 GN=IGLC6 PE=1 SV=1 - [IGLC6_HUMAN]	46.23	3	3	3	36	1.12339e+07	3.32357e+06	5.00854e+06	23.5129	32.08	2	8	39.3501	46.23	3	13	45.2158	32.08	2	15	106	11.2695	7.23975
P02768	Albumin OS=Homo sapiens OX=9606 GN=ALB PE=1 SV=2 - [ALBU_HUMAN]	43.51	1	25	25	1687	1.51541e+09	1.45311e+09	2.04462e+09	1534.99	35.63	21	489	1757.21	39.74	23	596	1784.8	43.19	24	602	609	69.3215	6.27783
P02787	Serotransferrin OS=Homo sapiens OX=9606 GN=TF PE=1 SV=3 - [TRFE_HUMAN]	36.39	1	21	21	125	8.16995e+06	8.50794e+06	8.38457e+06	157.597	36.39	21	41	160.528	36.39	21	43	154.132	34.53	19	41	698	77.0136	7.12256
P04264	Keratin, type II cytoskeletal 1 OS=Homo sapiens OX=9606 GN=KRT1 PE=1 SV=6 - [K2C1_HUMAN]	32.61	1	17	18	156	2.4382e+07	2.22748e+07	2.08225e+07	197.305	31.21	17	50	217.812	32.61	18	56	199.987	29.66	15	50	644	65.999	8.11865
P35908	Keratin, type II cytoskeletal 2 epidermal OS=Homo sapiens OX=9606 GN=KRT2 PE=1 SV=2 - [K22E_HUMAN]	31.77	1	14	16	104	1.33289e+07	1.19043e+07	1.14083e+07	128.805	27.39	14	29	151.721	31.77	16	36	159.983	31.77	16	39	639	65.3932	8.00146
P35527	Keratin, type I cytoskeletal 9 OS=Homo sapiens OX=9606 GN=KRT9 PE=1 SV=3 - [K1C9_HUMAN]	31.46	1	12	12	84	6.41346e+06	6.83507e+06	6.87258e+06	119.919	22.63	10	28	111.83	22.63	10	27	131.234	31.46	12	29	623	62.0268	5.23682
P02647	Apolipoprotein A-I OS=Homo sapiens OX=9606 GN=APOA1 PE=1 SV=1 - [APOA1_HUMAN]	30.71	1	7	7	32	4.7529e+06	5.92811e+06	5.61914e+06	28.6774	22.47	5	9	36.5706	30.71	7	11	37.4599	26.22	6	12	267	30.7589	5.75732
P13645	Keratin, type I cytoskeletal 10 OS=Homo sapiens OX=9606 GN=KRT10 PE=1 SV=6 - [K1C10_HUMAN]	23.12	1	11	12	80	1.73458e+07	1.71674e+07	1.70127e+07	106.304	22.95	11	26	102.258	23.12	12	26	106.242	23.12	12	28	584	58.7917	5.21143
P00738	Haptoglobin OS=Homo sapiens OX=9606 GN=HP PE=1 SV=1 - [HPT_HUMAN]	22.66	1	7	7	62	5.5185e+06	4.3884e+06	3.88945e+06	84.5957	19.7	6	22	77.7082	22.66	7	21	74.4463	19.7	6	19	406	45.1766	6.58057
P02533	Keratin, type I cytoskeletal 14 OS=Homo sapiens OX=9606 GN=KRT14 PE=1 SV=4 - [K1C14_HUMAN]	20.97	1	7	8	27	3.53904e+06	3.81163e+06	2.73965e+06	33.4302	15.47	6	9	30.9234	19.07	7	9	32.2966	19.07	7	9	472	51.5294	5.16064
P01876	Immunoglobulin heavy constant alpha 1 OS=Homo sapiens OX=9606 GN=IGHA1 PE=1 SV=2 - [IGHA1_HUMAN]	17.85	1	5	5	20	3.60012e+06	2.43465e+06	3.26486e+06	16.1971	13.03	4	5	22.6062	15.3	4	7	24.3486	17.85	5	8	353	37.6306	6.50732
P13647	Keratin, type II cytoskeletal 5 OS=Homo sapiens OX=9606 GN=KRT5 PE=1 SV=3 - [K2C5_HUMAN]	17.29	1	8	9	27	644122	1.41743e+06	903590	27.7137	15.42	8	9	34.9419	15.59	8	11	23.4497	12.2	6	7	590	62.34	7.73779
P01857	Immunoglobulin heavy constant gamma 1 OS=Homo sapiens OX=9606 GN=IGHG1 PE=1 SV=1 - [IGHG1_HUMAN]	15.15	2	4	4	23	1.33381e+07	1.25297e+07	1.18315e+07	26.5856	15.15	4	7	31.2557	15.15	4	9	23.219	15.15	4	7	330	36.0832	8.19189
P01009	Alpha-1-antitrypsin OS=Homo sapiens OX=9606 GN=SERPINA1 PE=1 SV=3 - [A1AT_HUMAN]	14.11	1	4	4	24	3.80712e+06	3.63809e+06	3.40545e+06	29.6634	14.11	4	8	28.7475	14.11	4	8	30.0686	14.11	4	8	418	46.707	5.59229
P01023	Alpha-2-macroglobulin OS=Homo sapiens OX=9606 GN=A2M PE=1 SV=3 - [A2MG_HUMAN]	13.09	1	15	15	46	2.17369e+06	2.17115e+06	2.09874e+06	50.6662	8.68	10	14	58.1191	12.48	14	18	51.6068	8.62	10	14	1474	163.188	6.45557
P01871	Immunoglobulin heavy constant mu OS=Homo sapiens OX=9606 GN=IGHM PE=1 SV=4 - [IGHM_HUMAN]	12.58	2	4	4	13	1.47987e+06	1.435e+06	1.48175e+06	15.3069	12.58	4	4	10.4603	9.27	3	3	21.3163	12.58	4	6	453	49.4086	6.771
P02760	Protein AMBP OS=Homo sapiens OX=9606 GN=AMBP PE=1 SV=1 - [AMBP_HUMAN]	12.22	1	3	3	5	198057	253295	433219	7.80499	12.22	3	3	5.98564	7.95	2	2		0			352	38.974	6.25244
P01024	Complement C3 OS=Homo sapiens OX=9606 GN=C3 PE=1 SV=2 - [CO3_HUMAN]	11.97	1	15	15	44	2.68455e+06	2.72855e+06	2.71097e+06	42.6591	9.44	12	13	47.5567	9.8	13	15	53.5417	10.64	13	16	1663	187.03	6.40479
P02774	Vitamin D-binding protein OS=Homo sapiens OX=9606 GN=GC PE=1 SV=2 - [VTDB_HUMAN]	10.34	1	3	3	8	379056	581000	853221	6.4378	6.12	2	2	10.8313	10.34	3	3	10.9267	6.54	2	3	474	52.8829	5.45264
P02790	Hemopexin OS=Homo sapiens OX=9606 GN=HPX PE=1 SV=2 - [HEMO_HUMAN]	8.23	1	3	3	9	2.77965e+06	1.97348e+06	2.63182e+06	5.94138	4.76	2	2	8.77698	8.23	3	4	7.50495	4.76	2	3	462	51.6433	7.02002
P01042	Kininogen-1 OS=Homo sapiens OX=9606 GN=KNG1 PE=1 SV=2 - [KNG1_HUMAN]	6.21	1	3	3	10	858237	590816	859723	10.7099	3.88	2	3	14.2693	6.21	3	4	10.3345	3.88	2	3	644	71.9122	6.81494
P01008	Antithrombin-III OS=Homo sapiens OX=9606 GN=SERPINC1 PE=1 SV=1 - [ANT3_HUMAN]	4.31	1	2	2	4	1.70271e+06	1.63086e+06	3.36775e+06	6.55298	4.31	2	2	5.6757	4.31	2	2		0			464	52.5689	6.7124
P04003	C4b-binding protein alpha chain OS=Homo sapiens OX=9606 GN=C4BPA PE=1 SV=2 - [C4BPA_HUMAN]	4.19	1	2	2	2	221973	190633	0	5.82668	4.19	2	2		0				0			597	66.9894	7.29834
P00450	Ceruloplasmin OS=Homo sapiens OX=9606 GN=CP PE=1 SV=1 - [CERU_HUMAN]	4.04	1	3	3	6	1.0386e+06	569020	609306		0			13.0779	4.04	3	4	6.74467	2.72	2	2	1065	122.128	5.71924
P04196	Histidine-rich glycoprotein OS=Homo sapiens OX=9606 GN=HRG PE=1 SV=1 - [HRG_HUMAN]	4	1	2	2	7	1.29947e+06	1.32041e+06	1.15159e+06	9.78471	4	2	3	7.02761	4	2	2	7.64481	4	2	2	525	59.5409	7.50342
P0C0L5	Complement C4-B OS=Homo sapiens OX=9606 GN=C4B PE=1 SV=2 - [CO4B_HUMAN]	3.56	2	5	5	11	409797	316100	332305	12.3726	2.87	4	4	9.35355	2.12	3	3	11.9243	2.81	4	4	1744	192.631	7.26904
P04114	Apolipoprotein B-100 OS=Homo sapiens OX=9606 GN=APOB PE=1 SV=2 - [APOB_HUMAN]	0.64	1	2	2	2	222125	149829	0		0			4.60471	0.64	2	2		0			4563	515.283	7.04932

## Sheet: PCL-rGO
Accession	Description	ΣCoverage	Σ# Proteins	Σ# Unique Peptides	Σ# Peptides	Σ# PSMs	A5: Area	B5: Area	C5: Area	Score A2	Coverage A2	# Peptides A2	# PSM A2	Score B2	Coverage B2	# Peptides B2	# PSM B2	Score C2	Coverage C2	# Peptides C2	# PSM C2	# AAs	MW [kDa]	calc. pI
P01834	Immunoglobulin kappa constant OS=Homo sapiens OX=9606 GN=IGKC PE=1 SV=2 - [IGKC_HUMAN]	51.4	1	3	3	47	9.99209e+06	7.55427e+06	6.85417e+06	52.5239	51.4	3	15	54.4247	51.4	3	17	53.6032	51.4	3	15	107	11.7578	6.52197
P02768	Albumin OS=Homo sapiens OX=9606 GN=ALB PE=1 SV=2 - [ALBU_HUMAN]	39.74	1	24	24	1807	1.89045e+09	2.02734e+09	2.0222e+09	1738.24	37.77	22	592	1904.58	39.41	23	655	1678	37.6	22	560	609	69.3215	6.27783
P02787	Serotransferrin OS=Homo sapiens OX=9606 GN=TF PE=1 SV=3 - [TRFE_HUMAN]	36.39	1	21	21	118	6.91879e+06	7.89142e+06	8.03808e+06	145.601	36.39	21	38	159.903	36.39	20	44	135.284	30.95	17	36	698	77.0136	7.12256
P02647	Apolipoprotein A-I OS=Homo sapiens OX=9606 GN=APOA1 PE=1 SV=1 - [APOA1_HUMAN]	34.08	1	8	8	38	6.57803e+06	6.59476e+06	6.33008e+06	44.1801	34.08	8	15	40.709	26.22	6	13	33.6894	30.71	7	10	267	30.7589	5.75732
P35527	Keratin, type I cytoskeletal 9 OS=Homo sapiens OX=9606 GN=KRT9 PE=1 SV=3 - [K1C9_HUMAN]	33.07	1	13	13	109	8.49714e+06	9.25098e+06	9.50077e+06	152.041	31.46	12	37	158.408	33.07	13	37	155.603	33.07	13	35	623	62.0268	5.23682
P04264	Keratin, type II cytoskeletal 1 OS=Homo sapiens OX=9606 GN=KRT1 PE=1 SV=6 - [K2C1_HUMAN]	32.61	1	17	18	183	2.39354e+07	2.48162e+07	2.43832e+07	238.068	32.61	18	62	242.706	32.61	18	63	230.481	29.81	16	58	644	65.999	8.11865
P0CF74	Immunoglobulin lambda constant 6 OS=Homo sapiens OX=9606 GN=IGLC6 PE=1 SV=1 - [IGLC6_HUMAN]	32.08	3	2	2	33	8.13865e+06	8.44713e+06	7.97427e+06	30.9268	32.08	2	11	34.835	32.08	2	12	30.7626	32.08	2	10	106	11.2695	7.23975
P35908	Keratin, type II cytoskeletal 2 epidermal OS=Homo sapiens OX=9606 GN=KRT2 PE=1 SV=2 - [K22E_HUMAN]	29.89	1	13	14	83	1.05133e+07	1.10462e+07	1.06893e+07	117.367	26.92	13	28	129.42	27.39	13	30	105.895	28.48	13	25	639	65.3932	8.00146
P08779	Keratin, type I cytoskeletal 16 OS=Homo sapiens OX=9606 GN=KRT16 PE=1 SV=4 - [K1C16_HUMAN]	27.91	1	5	12	45	4.26508e+06	3.87328e+06	3.6042e+06	46.3789	22.83	10	14	55.1864	25.58	11	17	50.474	25.58	11	14	473	51.2362	5.04639
P13645	Keratin, type I cytoskeletal 10 OS=Homo sapiens OX=9606 GN=KRT10 PE=1 SV=6 - [K1C10_HUMAN]	26.37	1	11	12	78	1.43125e+07	1.42103e+07	1.42236e+07	102.075	26.37	12	26	109.106	22.95	11	28	97.9754	22.95	11	24	584	58.7917	5.21143
P02533	Keratin, type I cytoskeletal 14 OS=Homo sapiens OX=9606 GN=KRT14 PE=1 SV=4 - [K1C14_HUMAN]	25.42	1	3	11	43	4.26508e+06	3.87328e+06	3.6042e+06	51.2926	23.09	10	14	60.9746	21.4	9	17	46.718	19.07	8	12	472	51.5294	5.16064
P00738	Haptoglobin OS=Homo sapiens OX=9606 GN=HP PE=1 SV=1 - [HPT_HUMAN]	23.89	1	8	8	59	3.92333e+06	3.25355e+06	3.04338e+06	79.8801	20.94	7	20	89.464	23.89	8	23	64.9695	19.7	6	16	406	45.1766	6.58057
P81605	Dermcidin OS=Homo sapiens OX=9606 GN=DCD PE=1 SV=2 - [DCD_HUMAN]	20	1	2	2	2	0	1.35501e+06	1.50016e+06						0			6.87924	20	2	2	110	11.2768	6.53662
P01876	Immunoglobulin heavy constant alpha 1 OS=Homo sapiens OX=9606 GN=IGHA1 PE=1 SV=2 - [IGHA1_HUMAN]	17.85	1	5	5	21	2.82502e+06	2.73223e+06	2.62884e+06	20.6588	17.85	5	7	22.8115	17.85	5	7	21.7322	17.85	5	7	353	37.6306	6.50732
P13647	Keratin, type II cytoskeletal 5 OS=Homo sapiens OX=9606 GN=KRT5 PE=1 SV=3 - [K2C5_HUMAN]	17.29	1	8	9	30	2.32386e+06	1.90778e+06	1.47295e+06	32.1966	15.25	8	10	35.6608	15.59	8	11	32.208	15.59	8	9	590	62.34	7.73779
Q04695	Keratin, type I cytoskeletal 17 OS=Homo sapiens OX=9606 GN=KRT17 PE=1 SV=2 - [K1C17_HUMAN]	15.51	1	3	7	29	2.57427e+06	2.44225e+06	2.60043e+06	33.089	15.51	7	9	41.1287	15.51	7	11	33.4951	15.51	7	9	432	48.076	5.021
P01857	Immunoglobulin heavy constant gamma 1 OS=Homo sapiens OX=9606 GN=IGHG1 PE=1 SV=1 - [IGHG1_HUMAN]	15.15	2	3	4	17	1.11665e+07	1.12331e+07	1.0498e+07	20.8953	15.15	4	6	20.1903	15.15	4	6	15.4828	15.15	4	5	330	36.0832	8.19189
P01009	Alpha-1-antitrypsin OS=Homo sapiens OX=9606 GN=SERPINA1 PE=1 SV=3 - [A1AT_HUMAN]	14.11	1	4	4	21	3.15255e+06	3.16998e+06	3.10269e+06	22.5804	10.29	3	6	27.2159	10.29	3	7	31.3673	14.11	4	8	418	46.707	5.59229
P01871	Immunoglobulin heavy constant mu OS=Homo sapiens OX=9606 GN=IGHM PE=1 SV=4 - [IGHM_HUMAN]	12.58	2	4	4	9	1.35478e+06	6.12793e+06	655730	10.7102	9.27	3	3	11.3189	9.27	3	3	12.3686	9.27	3	3	453	49.4086	6.771
P01024	Complement C3 OS=Homo sapiens OX=9606 GN=C3 PE=1 SV=2 - [CO3_HUMAN]	11.24	1	15	15	39	2.43368e+06	2.37016e+06	2.21932e+06	34.4583	7.16	10	12	43.1097	9.02	12	13	50.8073	10.1	13	14	1663	187.03	6.40479
P01023	Alpha-2-macroglobulin OS=Homo sapiens OX=9606 GN=A2M PE=1 SV=3 - [A2MG_HUMAN]	10.92	1	13	13	40	1.66341e+06	1.78164e+06	1.62064e+06	46.5166	8.07	10	13	46.2659	9.57	11	14	46.1711	8.96	10	13	1474	163.188	6.45557
P02774	Vitamin D-binding protein OS=Homo sapiens OX=9606 GN=GC PE=1 SV=2 - [VTDB_HUMAN]	10.34	1	3	3	6	567542	333616	545739	9.74094	10.34	3	3	10.5038	6.12	2	3		0			474	52.8829	5.45264
O76009	Keratin, type I cuticular Ha3-I OS=Homo sapiens OX=9606 GN=KRT33A PE=2 SV=2 - [KT33A_HUMAN]	8.42	2	3	3	8	848646	709967	681205	7.53692	5.69	2	2	10.2306	8.42	3	3	11.2368	8.42	3	3	404	45.9114	4.81787
P02790	Hemopexin OS=Homo sapiens OX=9606 GN=HPX PE=1 SV=2 - [HEMO_HUMAN]	8.23	1	3	3	8	2.67383e+06	1.9438e+06	2.83539e+06	5.70171	4.76	2	2	8.30121	8.23	3	4	5.52851	4.76	2	2	462	51.6433	7.02002
P02538	Keratin, type II cytoskeletal 6A OS=Homo sapiens OX=9606 GN=KRT6A PE=1 SV=3 - [K2C6A_HUMAN]	7.62	3	4	5	14	1.42624e+06	1.25122e+06	1.11173e+06	15.9912	6.03	4	5	9.84635	6.03	3	3	17.7249	7.62	5	6	564	60.0083	8.00146
P25311	Zinc-alpha-2-glycoprotein OS=Homo sapiens OX=9606 GN=AZGP1 PE=1 SV=2 - [ZA2G_HUMAN]	7.38	1	2	2	2	239588	0	151293	6.11636	7.38	2	2		0				0			298	34.2371	6.04932
P01859	Immunoglobulin heavy constant gamma 2 OS=Homo sapiens OX=9606 GN=IGHG2 PE=1 SV=2 - [IGHG2_HUMAN]	7.36	2	1	2	7	7.89454e+06	7.85364e+06	7.71596e+06		0				0			19.3431	7.36	2	5	326	35.8778	7.59131
P01008	Antithrombin-III OS=Homo sapiens OX=9606 GN=SERPINC1 PE=1 SV=1 - [ANT3_HUMAN]	7.11	1	3	3	11	1.38041e+06	1.94943e+06	1.90205e+06	6.39358	4.31	2	2	10.8991	7.11	3	5	10.9479	7.11	3	4	464	52.5689	6.7124
P01042	Kininogen-1 OS=Homo sapiens OX=9606 GN=KNG1 PE=1 SV=2 - [KNG1_HUMAN]	6.21	1	3	3	12	686146	669797	683675	13.9521	6.21	3	4	14.2036	6.21	3	4	13.8788	6.21	3	4	644	71.9122	6.81494
P04196	Histidine-rich glycoprotein OS=Homo sapiens OX=9606 GN=HRG PE=1 SV=1 - [HRG_HUMAN]	6.1	1	3	3	5	968741	886044	1.13916e+06	10.5406	6.1	3	3	6.89936	4	2	2		0			525	59.5409	7.50342
P01011	Alpha-1-antichymotrypsin OS=Homo sapiens OX=9606 GN=SERPINA3 PE=1 SV=2 - [AACT_HUMAN]	4.49	1	2	2	2	411309	0	0	6.34468	4.49	2	2		0				0			423	47.6205	5.51611
P04003	C4b-binding protein alpha chain OS=Homo sapiens OX=9606 GN=C4BPA PE=1 SV=2 - [C4BPA_HUMAN]	4.19	1	2	2	4	182183	142115	211750	6.59506	4.19	2	2	6.81081	4.19	2	2		0			597	66.9894	7.29834
P0C0L4	Complement C4-A OS=Homo sapiens OX=9606 GN=C4A PE=1 SV=2 - [CO4A_HUMAN]	3.38	2	5	5	11	331914	342134	356213	11.7404	2.81	4	4	9.65865	2.12	3	3	13.1129	2.69	4	4	1744	192.664	7.07861
P00450	Ceruloplasmin OS=Homo sapiens OX=9606 GN=CP PE=1 SV=1 - [CERU_HUMAN]	2.72	1	2	2	4	568482	560267	904760	5.68768	2.72	2	2	7.00517	2.72	2	2		0			1065	122.128	5.71924
P08603	Complement factor H OS=Homo sapiens OX=9606 GN=CFH PE=1 SV=4 - [CFAH_HUMAN]	2.68	1	3	3	7	179095	236307	207708	5.41739	1.95	2	2	6.60194	1.95	2	2	8.24866	2.68	3	3	1231	139.005	6.60986
Q5D862	Filaggrin-2 OS=Homo sapiens OX=9606 GN=FLG2 PE=1 SV=1 - [FILA2_HUMAN]	2.59	1	2	2	2	268569	0	0	5.59627	2.59	2	2		0				0			2391	247.928	8.30908
P04114	Apolipoprotein B-100 OS=Homo sapiens OX=9606 GN=APOB PE=1 SV=2 - [APOB_HUMAN]	0.64	1	2	2	6	150552	154347	149490	5.77879	0.64	2	2	5.12579	0.64	2	2	5.3468	0.64	2	2	4563	515.283	7.04932

## Sheet: PCL-GOCOOH
Accession	Description	ΣCoverage	Σ# Proteins	Σ# Unique Peptides	Σ# Peptides	Σ# PSMs	A5: Area	B5: Area	C5: Area	Score A2	Coverage A2	# Peptides A2	# PSM A2	Score B2	Coverage B2	# Peptides B2	# PSM B2	Score C2	Coverage C2	# Peptides C2	# PSM C2	# AAs	MW [kDa]	calc. pI
Q14525	Keratin, type I cuticular Ha3-II OS=Homo sapiens OX=9606 GN=KRT33B PE=1 SV=3 - [KT33B_HUMAN]	38.61	1	4	14	77	2.17314e+07	2.1971e+07	2.23219e+07	82.3156	31.68	11	25	82.7017	36.39	13	26	82.0169	38.12	13	26	404	46.1845	4.84326
O76009	Keratin, type I cuticular Ha3-I OS=Homo sapiens OX=9606 GN=KRT33A PE=2 SV=2 - [KT33A_HUMAN]	37.13	1	2	16	90	2.2667e+07	2.26184e+07	2.25963e+07	106.75	34.41	14	32	94.3392	31.44	13	28	101.102	36.39	14	30	404	45.9114	4.81787
P02768	Albumin OS=Homo sapiens OX=9606 GN=ALB PE=1 SV=2 - [ALBU_HUMAN]	34.98	1	20	20	1470	1.32225e+09	1.39043e+09	1.38771e+09	1354.78	29.72	17	446	1604.09	34.98	20	543	1466.31	32.18	17	481	609	69.3215	6.27783
P01834	Immunoglobulin kappa constant OS=Homo sapiens OX=9606 GN=IGKC PE=1 SV=2 - [IGKC_HUMAN]	34.58	2	2	2	19	6.94283e+06	6.7858e+06	6.32707e+06	27.9858	34.58	2	7	25.9993	34.58	2	6	26.296	34.58	2	6	107	11.7578	6.52197
Q15323	Keratin, type I cuticular Ha1 OS=Homo sapiens OX=9606 GN=KRT31 PE=1 SV=3 - [K1H1_HUMAN]	31.73	1	3	14	96	2.2667e+07	2.26184e+07	2.25963e+07	106.411	27.16	12	32	101.357	31.49	13	31	109.115	31.01	12	33	416	47.2071	4.88135
O43790	Keratin, type II cuticular Hb6 OS=Homo sapiens OX=9606 GN=KRT86 PE=1 SV=1 - [KRT86_HUMAN]	30.25	1	3	13	110	2.02901e+07	2.05835e+07	1.95448e+07	116.463	26.13	12	34	130.389	24.28	11	38	130.297	28.4	12	38	486	53.4663	5.65576
P35908	Keratin, type II cytoskeletal 2 epidermal OS=Homo sapiens OX=9606 GN=KRT2 PE=1 SV=2 - [K22E_HUMAN]	28.01	1	13	14	116	1.27327e+07	1.29114e+07	1.32113e+07	146.07	26.6	13	36	155.963	28.01	14	39	168.701	28.01	14	41	639	65.3932	8.00146
P02787	Serotransferrin OS=Homo sapiens OX=9606 GN=TF PE=1 SV=3 - [TRFE_HUMAN]	25.79	1	14	14	81	4.46119e+06	4.39518e+06	4.5182e+06	97.4128	23.5	13	27	102.921	24.21	13	28	96.1122	24.21	13	26	698	77.0136	7.12256
P00738	Haptoglobin OS=Homo sapiens OX=9606 GN=HP PE=1 SV=1 - [HPT_HUMAN]	23.15	1	8	8	41	1.76032e+06	1.89367e+06	1.8159e+06	50.4668	17	6	15	38.6459	16.01	6	11	49.7657	19.7	6	15	406	45.1766	6.58057
P13645	Keratin, type I cytoskeletal 10 OS=Homo sapiens OX=9606 GN=KRT10 PE=1 SV=6 - [K1C10_HUMAN]	23.12	1	10	11	78	1.84646e+07	1.80967e+07	1.75845e+07	99.1046	21.58	10	26	95.2563	23.12	11	26	96.8977	21.58	10	26	584	58.7917	5.21143
P78385	Keratin, type II cuticular Hb3 OS=Homo sapiens OX=9606 GN=KRT83 PE=1 SV=2 - [KRT83_HUMAN]	22.72	1	2	11	84	1.60651e+07	1.63746e+07	1.49032e+07	90.7444	18.66	10	28	93.4368	16.84	9	28	93.8936	20.89	10	28	493	54.1605	5.64307
P04264	Keratin, type II cytoskeletal 1 OS=Homo sapiens OX=9606 GN=KRT1 PE=1 SV=6 - [K2C1_HUMAN]	21.27	1	12	13	165	1.56037e+07	1.53275e+07	1.54667e+07	202.496	21.27	13	57	198.792	19.88	12	56	191.113	19.88	12	52	644	65.999	8.11865
O76015	Keratin, type I cuticular Ha8 OS=Homo sapiens OX=9606 GN=KRT38 PE=1 SV=3 - [KRT38_HUMAN]	19.74	1	7	8	50	6.13521e+06	7.32349e+06	7.57766e+06	58.9192	19.74	8	19	50.8631	15.79	7	15	52.8118	15.79	7	16	456	50.4474	4.84326
P35527	Keratin, type I cytoskeletal 9 OS=Homo sapiens OX=9606 GN=KRT9 PE=1 SV=3 - [K1C9_HUMAN]	18.3	1	9	9	79	9.33102e+06	9.48024e+06	9.55583e+06	110.514	18.3	9	27	113.588	18.3	9	27	107.876	16.85	8	25	623	62.0268	5.23682
P78386	Keratin, type II cuticular Hb5 OS=Homo sapiens OX=9606 GN=KRT85 PE=1 SV=1 - [KRT85_HUMAN]	17.36	1	4	8	80	1.48055e+07	1.51234e+07	1.28921e+07	83.3403	17.36	8	25	92.8144	15.58	7	28	89.5334	15.58	7	27	507	55.7665	6.55127
P02647	Apolipoprotein A-I OS=Homo sapiens OX=9606 GN=APOA1 PE=1 SV=1 - [APOA1_HUMAN]	17.23	1	4	4	15	1.46416e+06	1.41047e+06	1.30224e+06	13.4372	13.11	3	4	15.5377	17.23	4	5	19.6131	17.23	4	6	267	30.7589	5.75732
P02533	Keratin, type I cytoskeletal 14 OS=Homo sapiens OX=9606 GN=KRT14 PE=1 SV=4 - [K1C14_HUMAN]	15.25	1	5	6	17	1.35263e+06	1.95223e+06	1.40317e+06	17.5324	10.17	4	5	22.5959	12.08	5	7	17.5709	6.99	3	5	472	51.5294	5.16064
P13647	Keratin, type II cytoskeletal 5 OS=Homo sapiens OX=9606 GN=KRT5 PE=1 SV=3 - [K2C5_HUMAN]	13.56	1	7	7	18	1.10649e+06	1.18335e+06	1.24268e+06	23.6461	12.03	6	7	17.5709	10.17	5	5	21.6428	10.17	5	6	590	62.34	7.73779
P01859	Immunoglobulin heavy constant gamma 2 OS=Homo sapiens OX=9606 GN=IGHG2 PE=1 SV=2 - [IGHG2_HUMAN]	11.04	2	2	3	14	5.34094e+06	5.27884e+06	5.09727e+06	17.2735	11.04	3	5	15.186	11.04	3	4	19.1621	11.04	3	5	326	35.8778	7.59131
P01857	Immunoglobulin heavy constant gamma 1 OS=Homo sapiens OX=9606 GN=IGHG1 PE=1 SV=1 - [IGHG1_HUMAN]	10.91	2	2	3	12	1.1803e+07	1.15708e+07	1.1308e+07	11.9671	10.91	3	4	12.1732	10.91	3	4	11.5031	10.91	3	4	330	36.0832	8.19189
P01009	Alpha-1-antitrypsin OS=Homo sapiens OX=9606 GN=SERPINA1 PE=1 SV=3 - [A1AT_HUMAN]	10.29	1	3	3	10	1.15895e+06	985419	1.21933e+06	9.267	6.7	2	3	12.3939	10.29	3	4	9.87763	6.7	2	3	418	46.707	5.59229
Q03591	Complement factor H-related protein 1 OS=Homo sapiens OX=9606 GN=CFHR1 PE=1 SV=2 - [FHR1_HUMAN]	9.7	1	2	3	4	199829	233892	255242		0			12.7113	9.7	3	4		0			330	37.626	7.38623
P01871	Immunoglobulin heavy constant mu OS=Homo sapiens OX=9606 GN=IGHM PE=1 SV=4 - [IGHM_HUMAN]	9.27	2	3	3	10	502992	508573	517862	11.025	9.27	3	3	10.9157	9.27	3	3	16.4996	9.27	3	4	453	49.4086	6.771
Q14532	Keratin, type I cuticular Ha2 OS=Homo sapiens OX=9606 GN=KRT32 PE=1 SV=3 - [K1H2_HUMAN]	8.93	1	2	4	40	9.88848e+06	1.12617e+07	1.1469e+07	45.1278	8.93	4	14	42.7337	8.93	4	13	42.8522	8.93	4	13	448	50.3102	4.84326
P01876	Immunoglobulin heavy constant alpha 1 OS=Homo sapiens OX=9606 GN=IGHA1 PE=1 SV=2 - [IGHA1_HUMAN]	8.78	1	3	3	13	1.71263e+06	1.26549e+06	1.42261e+06	15.0707	8.78	3	5	13.4765	6.23	2	4	12.9049	8.78	3	4	353	37.6306	6.50732
P25311	Zinc-alpha-2-glycoprotein OS=Homo sapiens OX=9606 GN=AZGP1 PE=1 SV=2 - [ZA2G_HUMAN]	7.38	1	2	2	2	96995.3	159530	107836		0			7.21598	7.38	2	2		0			298	34.2371	6.04932
P01023	Alpha-2-macroglobulin OS=Homo sapiens OX=9606 GN=A2M PE=1 SV=3 - [A2MG_HUMAN]	6.38	1	8	8	27	1.04324e+06	1.00522e+06	985939	32.3194	6.38	8	10	32.5217	6.38	8	10	23.3614	4.55	6	7	1474	163.188	6.45557
P01042	Kininogen-1 OS=Homo sapiens OX=9606 GN=KNG1 PE=1 SV=2 - [KNG1_HUMAN]	6.21	1	3	3	13	365881	423153	397087	12.8378	6.21	3	4	10.751	6.21	3	4	16.2253	6.21	3	5	644	71.9122	6.81494
P0DPA2	V-set and immunoglobulin domain-containing protein 8 OS=Homo sapiens OX=9606 GN=VSIG8 PE=2 SV=1 - [VSIG8_HUMAN]	6.04	1	2	2	2	209196	243558	197252	6.08415	6.04	2	2		0				0			414	43.8625	7.1958
P01011	Alpha-1-antichymotrypsin OS=Homo sapiens OX=9606 GN=SERPINA3 PE=1 SV=2 - [AACT_HUMAN]	4.49	1	2	2	2	477486	0	316702		0				0			5.94046	4.49	2	2	423	47.6205	5.51611
P01024	Complement C3 OS=Homo sapiens OX=9606 GN=C3 PE=1 SV=2 - [CO3_HUMAN]	3.91	1	6	6	18	2.91072e+06	2.96474e+06	3.06408e+06	15.5076	2.65	4	6	14.7805	3.37	5	6	14.9314	3.37	5	6	1663	187.03	6.40479
Q02413	Desmoglein-1 OS=Homo sapiens OX=9606 GN=DSG1 PE=1 SV=2 - [DSG1_HUMAN]	3.81	1	3	3	4	319870	137374	257527		0			6.08489	2.57	2	2	6.03181	2.76	2	2	1049	113.676	5.03369
P00450	Ceruloplasmin OS=Homo sapiens OX=9606 GN=CP PE=1 SV=1 - [CERU_HUMAN]	2.72	1	2	2	4	179784	278570	240332		0			5.19311	2.72	2	2	5.53517	2.72	2	2	1065	122.128	5.71924
P08603	Complement factor H OS=Homo sapiens OX=9606 GN=CFH PE=1 SV=4 - [CFAH_HUMAN]	2.68	1	2	3	7	350633	347834	475527	5.9406	1.95	2	2	8.31029	2.68	3	3	6.10694	1.95	2	2	1231	139.005	6.60986
P0C0L4	Complement C4-A OS=Homo sapiens OX=9606 GN=C4A PE=1 SV=2 - [CO4A_HUMAN]	1.43	2	2	2	2	222037	245525	360297		0			5.67591	1.43	2	2		0			1744	192.664	7.07861
